# Supplementary material for: Cytogenetic and molecular insight into the genetic background of disorders of sex development in seventeen cats
Source: PubMed Central journal article supplement (PMC9592617; doi:10.1038/s41598-022-21718-y), 2022-10-24
Supplement: 41598_2022_21718_MOESM1_ESM.pdf [file 41598_2022_21718_MOESM1_ESM.pdf]

## Supplementary materials

*Cytogenetic and molecular insight into the genetic background of disorders of sex development in seventeen cats, by Stachowiak et al.*

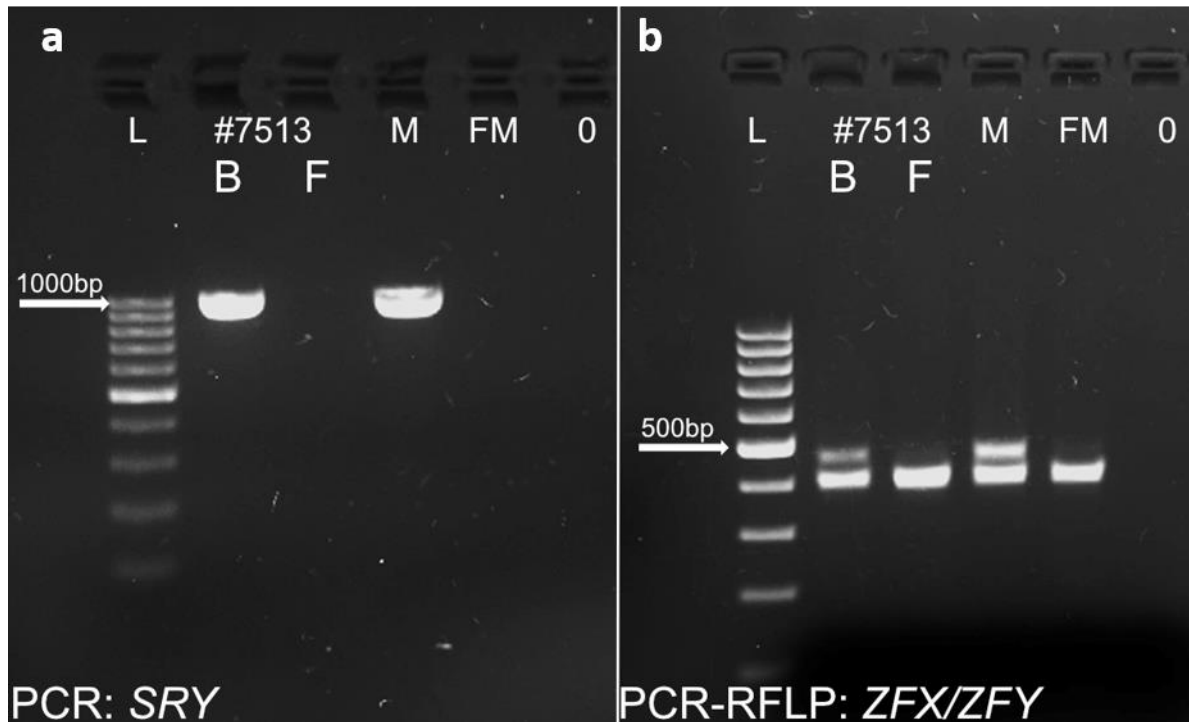

**Figure S1.** Detection of Y-linked genes in blood (B) and fibroblasts (F) of DSD case #7513. (a) *SRY* – 1022 bp band, and (b) *ZFY* – 448 bp band (391 bp band represents the X-linked *ZFX* gene). L – 100 – 1000 bp ladder, M – control male, FM – control female, 0 – negative control.

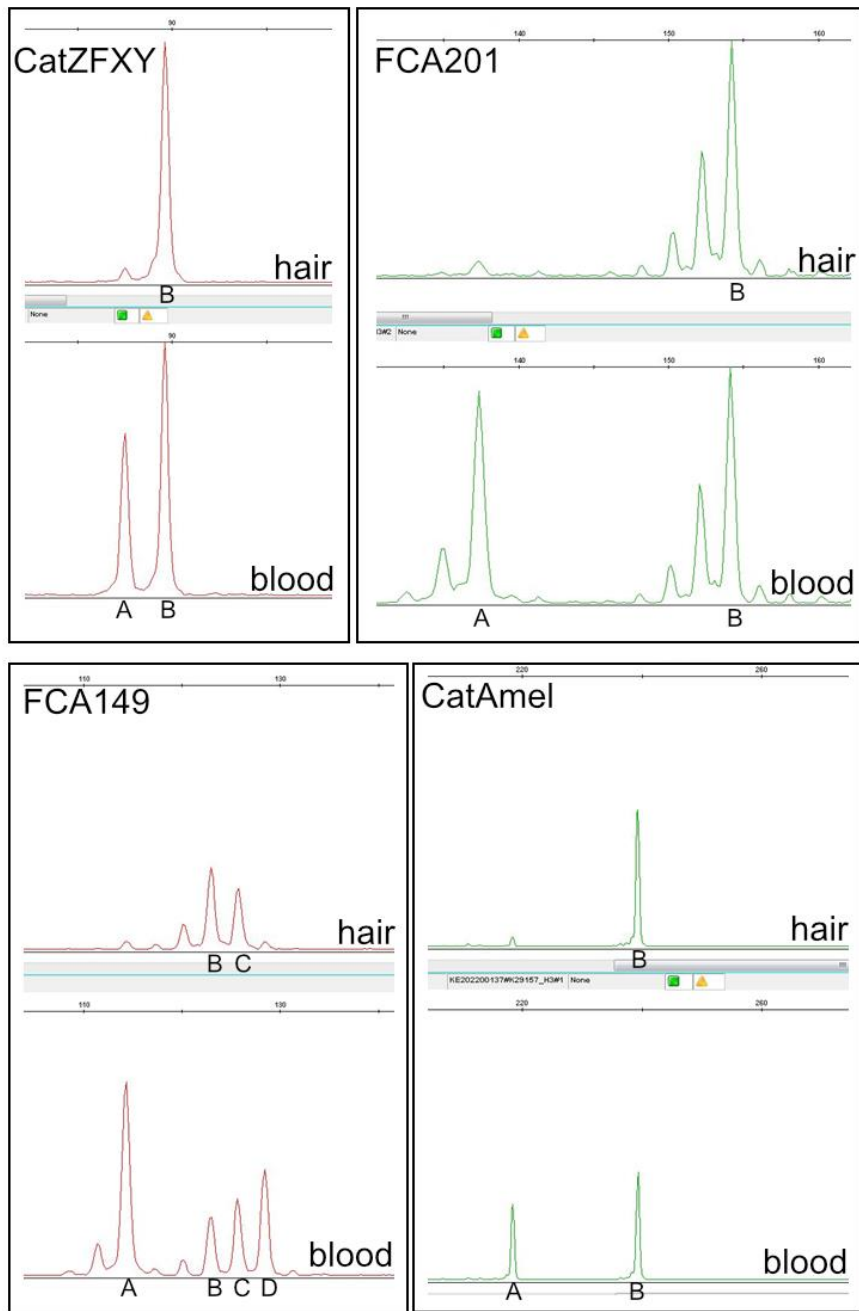

**Figure S2.** Analysis of STR markers, CatZFX, FCA201, FCA149, and CatAmel in DNA isolated from hair follicles and blood of DSD case #7513 showed additional alleles in DNA from blood that were not present in DNA from hair follicles, confirming the leukocyte chimerism. A,B,C,D – alleles.

**Table S1.** Control males analyzed in the study.

|    | <b>Cat (lab ID)</b> | <b>Breed</b>         | <b>SRY</b> |
|----|---------------------|----------------------|------------|
| 1  | #7361               | Domestic shorthair   | +          |
| 2  | #7362               | British              | +          |
| 3  | #7363               | Maine coon           | +          |
| 4  | #7364               | Domestic shorthair   | +          |
| 5  | #7365               | Ragdoll              | +          |
| 6  | #7367               | Domestic shorthair   | +          |
| 7  | #7371               | British longhair     | +          |
| 8  | #7372               | Maine coon           | +          |
| 9  | #7378               | Domestic shorthair   | +          |
| 10 | #7383               | Turkish angora       | +          |
| 11 | #7384               | Turkish angora       | +          |
| 12 | #7387               | Neva masquerade      | +          |
| 13 | #7388               | Domestic shorthair   | +          |
| 14 | #7390               | Domestic shorthair   | +          |
| 15 | #7392               | British              | +          |
| 16 | #7393               | British              | +          |
| 17 | #7394               | Maine coon           | +          |
| 18 | #7395               | Domestic shorthair   | +          |
| 19 | #7396               | Domestic shorthair   | +          |
| 20 | #7399               | Domestic shorthair   | +          |
| 21 | #7400               | Domestic shorthair   | +          |
| 22 | #7405               | Bengal               | +          |
| 23 | #7408               | Maine coon           | +          |
| 24 | #7409               | Maine coon           | +          |
| 25 | #7412               | Domestic shorthair   | +          |
| 26 | #7417               | Norwegian forest cat | +          |
| 27 | #7418               | British shorthair    | +          |
| 28 | #7421               | Domestic shorthair   | +          |
| 29 | #7422               | Domestic shorthair   | +          |
| 30 | #7424               | Ragdoll              | +          |
| 31 | #7429               | Domestic shorthair   | +          |
| 32 | #7432               | Domestic shorthair   | +          |
| 33 | #7435               | Domestic shorthair   | +          |
| 34 | #7376               | Domestic shorthair   | +          |
| 35 | #7419               | Domestic shorthair   | +          |
| 36 | #7427               | British              | +          |
| 37 | #7434               | Domestic shorthair   | +          |
| 38 | #7413               | Domestic shorthair   | +          |

**Table S2.** PCR primers and assays used in the study.

| Gene                                                                | Primer sequence 5' → 3'                                | Amplicon (bp) | Annealing temperature (°C) |
|---------------------------------------------------------------------|--------------------------------------------------------|---------------|----------------------------|
| <b>X inactivation status</b>                                        |                                                        |               |                            |
| <i>AR</i> (exon 1)                                                  | F: atccacgttgccctgct                                   | 209           | 60                         |
|                                                                     | R: 6-FAM-cagtggcctccctgttct                            |               |                            |
| <b>Detection of Y-linked genes or sequencing of candidate genes</b> |                                                        |               |                            |
| <i>SRY</i> (coding sequence) <sup>4</sup>                           | F: aactttgctaccaccaacc                                 | 1022          | 58                         |
|                                                                     | R: caatctgcggaaaactggat                                |               |                            |
| <i>ZFX/ZFY</i> <sup>20</sup>                                        | F: ataatcacatggagagccaccagct                           | 448           | 58                         |
|                                                                     | R: gcacttctttggtatctgagaaagt                           |               |                            |
| <i>TETY1</i> <sup>21</sup>                                          | 5' cagatgtgcaggggagcac<br>5' aatataatgtcctcaataaacgatg | 150           | 58                         |
| <i>TETY2</i> <sup>21</sup>                                          | 5' aatgaccagcttccattg<br>5' gctttgggcatcagtctagc       | 178           | 58                         |
| <i>CUL4BY</i> <sup>21</sup>                                         | 5' ataaaccctgccactgga<br>5' tctccaagctgtatttaacagaga   | 106           | 58                         |
| <i>CYORF15</i> <sup>21</sup>                                        | 5' tgtggttaggtgaaaacacacc<br>5' tgattcctatgaccaggcttc  | 100           | 58                         |
| <i>HSFY</i> <sup>21</sup>                                           | 5' tggatcagcatgccattta<br>5' ctggctgacacagcaggata      | 211           | 58                         |
| <i>FLJ36031</i> <sup>21</sup>                                       | 5' gcctgaggagaaggtgttgt<br>5' gcaccttctctggctgacc      | 128           | 58                         |
| <i>TAC3</i> (exon 3)                                                | F: tttctaacaagcccacagca                                | 424           | 62                         |
|                                                                     | R: attcaccaagccatctccag                                |               |                            |
| <i>CYP11B1</i> <sup>14</sup>                                        | F: aggctcagggaaactttgtctg                              | 413           | 60                         |
|                                                                     | R: gtttcgaccaggagtagag                                 |               |                            |
| <i>LHCGR</i> (exon 1)                                               | F: ggttgaggcagagcacagt                                 | 500           | 59                         |
|                                                                     | R: gggatggcagagacagtcc                                 |               |                            |
| <i>LHCGR</i> (exon 2)                                               | F: aactccggtgtgtctgatcc                                | 441           | 62                         |

|                                                              |                                        |     |    |
|--------------------------------------------------------------|----------------------------------------|-----|----|
|                                                              | R: ctggggtttcttgaacacaa                |     |    |
| <i>LHCGR</i> (exon 3)                                        | F: gagatggcagcacttgatga                | 491 | 61 |
|                                                              | R: gctacttggcaggactccac                |     |    |
| <i>LHCGR</i> (exon 4)                                        | F: gcttcatagagtggggtgga                | 510 | 62 |
|                                                              | R: cctggtggctgacaagaaat                |     |    |
| <i>LHCGR</i> (exons 5 and 6)                                 | F: gtcccagcccctagatcttt                | 679 | 62 |
|                                                              | R: tgggtcagttggttgtgtg                 |     |    |
| <i>LHCGR</i> (exon 7)                                        | F: tgaatgtgcatacgccagt                 | 454 | 62 |
|                                                              | R: agaggaggctgtgagatga                 |     |    |
| <i>LHCGR</i> (exon 8)                                        | F: caatccccctttccctcta                 | 333 | 62 |
|                                                              | R: cagtgccccagttagtgtt                 |     |    |
| <i>LHCGR</i> (exon 9)                                        | F: attaggggaaggcaagatg                 | 448 | 62 |
|                                                              | R: tttcggaagaaacaggatg                 |     |    |
| <i>LHCGR</i> (exon 10)                                       | F: ggagcccacacaaaactt                  | 441 | 62 |
|                                                              | R: tttgcaaacatccctcaat                 |     |    |
| <i>LHCGR</i> (exon 11)                                       | F: actgaggctgttggcttt                  | 873 | 62 |
|                                                              | R: gccatcagctctggatttg                 |     |    |
| <i>LHCGR</i> (exon 11)                                       | F: acgctattcagctggaccaa                | 859 | 62 |
|                                                              | R: gcaatggtcatggacaacac                |     |    |
| <b><i>SRY</i> and <i>AMELX/AMELY</i> copy number (ddPCR)</b> |                                        |     |    |
| <i>SRY</i><br>(coding<br>sequence)                           | F: ttgcacggagagtcttacct                | 114 | 58 |
|                                                              | R: tctcagaccacacatgaa                  |     |    |
|                                                              | Probe: FAM-tgtgaaaccagaggaaaggg-BHQ1   |     |    |
| <i>SRY</i><br>(5'-flanking<br>region)                        | F: gagacttaagcgtggcggat                | 100 | 58 |
|                                                              | R: ccgaagcccaacctaccatt                |     |    |
|                                                              | Probe: FAM-gcagtgagccgagcatgaacct-BQH1 |     |    |
| <i>F2</i> (reference<br>gene)                                | F: agcgagaaccaggacttcaa                | 98  | 58 |
|                                                              | R: ccggacacataacaccacac                |     |    |
|                                                              | Probe: HEX-ctggagaagaacttctgccg-BHQ1   |     |    |
| <i>AMELX</i>                                                 | F: tcagtcccgttttctcagtt                | 107 | 58 |
|                                                              | R: agtcagagaggccgagcag                 |     |    |

|       |                                      |    |    |
|-------|--------------------------------------|----|----|
|       | Probe: HEX-tcctggtttaagccctgatg-BHQ1 |    |    |
| AMELY | F: caagatgtttctcagtcctgct            | 90 | 58 |
|       | R: gaggccaaataggagtgtgc              |    |    |
|       | Probe: FAM-gttaaagcctgcattgtccc-BHQ1 |    |    |

#### References for Table S2:

<sup>4</sup> Szczerbal, I. *et al.* X monosomy in a virilized female cat. *Reprod. Domest. Anim.* **50**, 344–348 (2015).

<sup>14</sup> Owens, S. L. *et al.* Congenital adrenal hyperplasia associated with mutation in an 11 $\beta$ -hydroxylase-like gene in a cat. *J. Vet. Intern. Med.* **26**, 1221–1226 (2012).

<sup>20</sup> Senese, C., Penedo, M. C., Shiue, Y. L., Bowling, A. T. & Millon, L. V. A HaeIII PCR-RFLP in the ZFY/ZFX genes of horses. *Anim. Genet.* **30**, 390–391 (1999).

<sup>21</sup> Murphy, W. J. *et al.* Novel gene acquisition on carnivore Y chromosomes. *PLoS Genet.* **2**, e43 (2006).

**Table S3.** Results of the molecular analysis of *SRY* gene in XY DSD and control cats.

|                     | Cat (lab ID) | Breed                                             | Genotype for <i>SRY</i><br>c.389G>C SNP<br>(p.Arg130Thr) | <i>SRY</i> coding<br>sequence copy<br>number | <i>SRY</i> 5'-flanking<br>region copy<br>number |
|---------------------|--------------|---------------------------------------------------|----------------------------------------------------------|----------------------------------------------|-------------------------------------------------|
| <b>XY DSD cats</b>  |              |                                                   |                                                          |                                              |                                                 |
| 1                   | #6533        | Persian                                           | gc                                                       | 5                                            | 5                                               |
| 2                   | #6664        | Domestic<br>shorthair                             | gc                                                       | 5                                            | 5                                               |
| 3                   | #6680        | Domestic<br>shorthair                             | gc                                                       | 5                                            | 5                                               |
| 4                   | #6699        | Domestic<br>shorthair                             | gc                                                       | 6                                            | 6                                               |
| 5                   | #6721        | Crossbred<br>(Persian x<br>Domestic<br>shorthair) | gc                                                       | 5                                            | 5                                               |
| 6                   | #6856        | Domestic<br>shorthair                             | gg                                                       | 5                                            | 5                                               |
| 7                   | #6973        | Domestic<br>shorthair                             | gg                                                       | 5                                            | 5                                               |
| 8                   | #7036        | British<br>shorthair                              | gc                                                       | 5                                            | 5                                               |
| 9                   | #7145        | British<br>shorthair                              | gc                                                       | 5                                            | 5                                               |
| 10                  | #7254        | Domestic<br>shorthair                             | gc                                                       | 5                                            | 5                                               |
| 11                  | #7302        | Domestic<br>shorthair                             | gg                                                       | 5                                            | 5                                               |
| 12                  | #7320        | British<br>longhair                               | gc                                                       | 5                                            | 5                                               |
| 13                  | #7451        | Domestic<br>shorthair                             | gg                                                       | 4                                            | 4                                               |
| 14                  | #7455        | Ragdoll                                           | gc                                                       | 5                                            | 5                                               |
| <b>Control cats</b> |              |                                                   |                                                          |                                              |                                                 |
| 1                   | #7361        | Domestic<br>shorthair                             | gg                                                       | 5                                            | 5                                               |
| 2                   | #7362        | British                                           | gc                                                       | 5                                            | 5                                               |
| 3                   | #7363        | Maine coon                                        | gc                                                       | 5                                            | 5                                               |
| 4                   | #7364        | Domestic<br>shorthair                             | gg                                                       | 5                                            | 5                                               |
| 5                   | #7365        | Ragdoll                                           | gc                                                       | 5                                            | 5                                               |
| 6                   | #7367        | Domestic<br>shorthair                             | gg                                                       | 5                                            | 5                                               |
| 7                   | #7371        | British<br>longhair                               | gc                                                       | 5                                            | 5                                               |
| 8                   | #7372        | Maine coon                                        | gc                                                       | 5                                            | 5                                               |
| 9                   | #7378        | Domestic<br>shorthair                             | gg                                                       | 5                                            | 5                                               |

|    |       |                         |    |   |   |
|----|-------|-------------------------|----|---|---|
| 10 | #7383 | Turkish<br>angora       | gc | 5 | 5 |
| 11 | #7384 | Turkish<br>angora       | gc | 5 | 5 |
| 12 | #7387 | Neva<br>masquerade      | gc | 5 | 5 |
| 13 | #7388 | Domestic<br>shorthair   | gg | 5 | 5 |
| 14 | #7390 | Domestic<br>shorthair   | gg | 5 | 5 |
| 15 | #7392 | British                 | gc | 5 | 5 |
| 16 | #7393 | British                 | gc | 5 | 5 |
| 17 | #7394 | Maine coon              | gc | 5 | 5 |
| 18 | #7395 | Domestic<br>shorthair   | gc | 6 | 6 |
| 19 | #7396 | Domestic<br>shorthair   | gg | 5 | 5 |
| 20 | #7399 | Domestic<br>shorthair   | gc | 5 | 5 |
| 21 | #7400 | Domestic<br>shorthair   | gg | 5 | 5 |
| 22 | #7405 | Bengal                  | gc | 5 | 5 |
| 23 | #7408 | Maine coon              | gc | 5 | 5 |
| 24 | #7409 | Maine coon              | gc | 5 | 5 |
| 25 | #7412 | Domestic<br>shorthair   | gc | 5 | 5 |
| 26 | #7417 | Norwegian<br>forest cat | gg | 5 | 5 |
| 27 | #7418 | British<br>shorthair    | gc | 5 | 5 |
| 28 | #7421 | Domestic<br>shorthair   | gc | 5 | 5 |
| 29 | #7422 | Domestic<br>shorthair   | gc | 5 | 5 |
| 30 | #7424 | Ragdoll                 | gc | 5 | 5 |
| 31 | #7429 | Domestic<br>shorthair   | gg | 5 | 5 |
| 32 | #7432 | Domestic<br>shorthair   | gg | 5 | 5 |
| 33 | #7435 | Domestic<br>shorthair   | gg | 5 | 5 |
| 34 | #7376 | Domestic<br>shorthair   | gg | 5 | 5 |
| 35 | #7419 | Domestic<br>shorthair   | gg | 5 | 5 |
| 36 | #7427 | British                 | gc | 5 | 5 |
| 37 | #7434 | Domestic<br>shorthair   | gg | 5 | 5 |
| 38 | #7413 | Domestic<br>shorthair   | gg | 5 | 5 |



**Table S4.** Genotypes for polymorphisms in *LHCGR* gene analyzed in XY DSD versus control cats.

|                     | Cat (lab ID) | g.70455430C>G<br>(5'-flanking, -<br>23bp upstream<br>to TSS) | g.70455376delC<br>(5'UTR, exon 1) | g.70455334C>T<br>p.Ala7Thr (exon 1) | g.70400960C>T<br>p.Ala690Thr (exon 11) |
|---------------------|--------------|--------------------------------------------------------------|-----------------------------------|-------------------------------------|----------------------------------------|
| <b>XY DSD cats</b>  |              |                                                              |                                   |                                     |                                        |
| 1                   | #6533        | CC                                                           | ins/ins                           | CC                                  | CC                                     |
| 2                   | #6664        | CC                                                           | ins/ins                           | CC                                  | CT                                     |
| 3                   | #6680        | CG                                                           | ins/del                           | CC                                  | CT                                     |
| 4                   | #6699        | CG                                                           | ins/del                           | CC                                  | CC                                     |
| 5                   | #6721        | CC                                                           | ins/del                           | CC                                  | CC                                     |
| 6                   | #6856        | CC                                                           | ins/ins                           | CC                                  | CC                                     |
| 7                   | #6973        | CC                                                           | ins/ins                           | CC                                  | CC                                     |
| 8                   | #7036        | CC                                                           | ins/ins                           | CC                                  | CC                                     |
| 9                   | #7145        | CC                                                           | ins/ins                           | CC                                  | CC                                     |
| 10                  | #7254        | CC                                                           | ins/ins                           | CC                                  | CC                                     |
| 11                  | #7302        | GG                                                           | del/del                           | CC                                  | CC                                     |
| 12                  | #7320        | CC                                                           | ins/ins                           | CC                                  | CC                                     |
| 13                  | #7451        | CG                                                           | ins/del                           | CC                                  | CC                                     |
| 14                  | #7455        | CC                                                           | del/del                           | CC                                  | CC                                     |
| <b>Control cats</b> |              |                                                              |                                   |                                     |                                        |
| 1                   | #7361        | CC                                                           | ins/ins                           | CC                                  | CC                                     |
| 2                   | #7362        | CC                                                           | ins/ins                           | CC                                  | CC                                     |
| 3                   | #7363        | CC                                                           | ins/ins                           | CC                                  | CC                                     |
| 4                   | #7364        | CC                                                           | ins/ins                           | CC                                  | CT                                     |
| 5                   | #7365        | CC                                                           | ins/ins                           | CC                                  | CC                                     |
| 6                   | #7367        | CG                                                           | ins/del                           | CC                                  | CC                                     |
| 7                   | #7371        | CC                                                           | ins/ins                           | CC                                  | CC                                     |
| 8                   | #7372        | CG                                                           | ins/del                           | CC                                  | CC                                     |
| 9                   | #7378        | CC                                                           | ins/ins                           | CC                                  | CC                                     |
| 10                  | #7383        | CC                                                           | ins/ins                           | CC                                  | CC                                     |
| 11                  | #7384        | CC                                                           | ins/ins                           | CC                                  | CT                                     |
| 12                  | #7387        | CC                                                           | ins/ins                           | CC                                  | CC                                     |
| 13                  | #7388        | CC                                                           | ins/del                           | CC                                  | CT                                     |
| 14                  | #7390        | CG                                                           | ins/del                           | CC                                  | CC                                     |
| 15                  | #7392        | CC                                                           | ins/ins                           | CC                                  | CC                                     |
| 16                  | #7393        | CC                                                           | ins/ins                           | CC                                  | CC                                     |
| 17                  | #7394        | CC                                                           | ins/ins                           | CC                                  | CC                                     |
| 18                  | #7395        | CC                                                           | ins/ins                           | CC                                  | CT                                     |
| 19                  | #7396        | CC                                                           | ins/ins                           | CC                                  | CC                                     |
| 20                  | #7399        | CG                                                           | ins/del                           | CC                                  | CC                                     |
| 21                  | #7400        | CC                                                           | ins/ins                           | CC                                  | TT                                     |
| 22                  | #7405        | CC                                                           | ins/ins                           | CC                                  | CT                                     |
| 23                  | #7408        | CC                                                           | ins/ins                           | CC                                  | CT                                     |
| 24                  | #7409        | CC                                                           | ins/ins                           | CC                                  | CT                                     |

|    |       |    |         |    |    |
|----|-------|----|---------|----|----|
| 25 | #7412 | CC | ins/ins | CC | CT |
| 26 | #7417 | CC | ins/ins | CC | CC |
| 27 | #7418 | CC | ins/ins | CC | CT |
| 28 | #7421 | CC | ins/ins | CC | CC |
| 29 | #7422 | CG | ins/del | CC | CC |
| 30 | #7424 | CC | ins/del | CC | CC |
| 31 | #7429 | CC | ins/ins | CC | CC |
| 32 | #7432 | CC | ins/ins | CC | CC |
| 33 | #7435 | CG | ins/del | CC | CC |
| 34 | #7376 | CC | ins/ins | CC | CC |
| 35 | #7419 | CC | ins/ins | CT | CT |
| 36 | #7427 | CC | ins/ins | CC | CC |
| 37 | #7434 | CG | ins/del | CC | CC |
| 38 | #7413 | CC | ins/ins | CC | CT |
